# Supplementary material for: Template free preparation of nanoporous organically modified silica thin films on flexible substrates
Source: Royal Society of Chemistry journal article supplement (doi:10.1039/c1jm12188j), 2011-01-01
Supplement: c1jm12188j.pdf [file c1jm12188j.pdf]

## Supplementary Information

### Template free preparation of nanoporous organically modified silica thin films on flexible substrates

Adem Yildirim,<sup>ab</sup> Hulya Budunoglu,<sup>ab</sup> Mecit Yaman,<sup>ab</sup> Mustafa O. Guler<sup>ab</sup> and Mehmet Bayindir<sup>\*abc</sup>

<sup>a</sup>UNAM-National Nanotechnology Research Center, Bilkent University, 06800 Ankara, Turkey

<sup>b</sup>Institute of Materials Science and Nanotechnology, Bilkent University, 06800 Ankara, Turkey

<sup>c</sup>Department of Physics, Bilkent University, 06800 Ankara, Turkey

\*Corresponding author: E-mail: bayindir@nano.org.tr

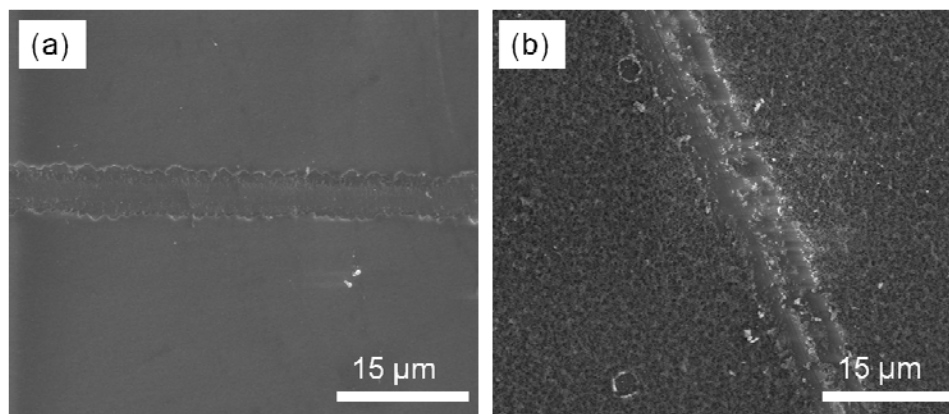

**Fig. S1** SEM images of the films after scratching with a sand paper. (a) D7 and (b) M7.

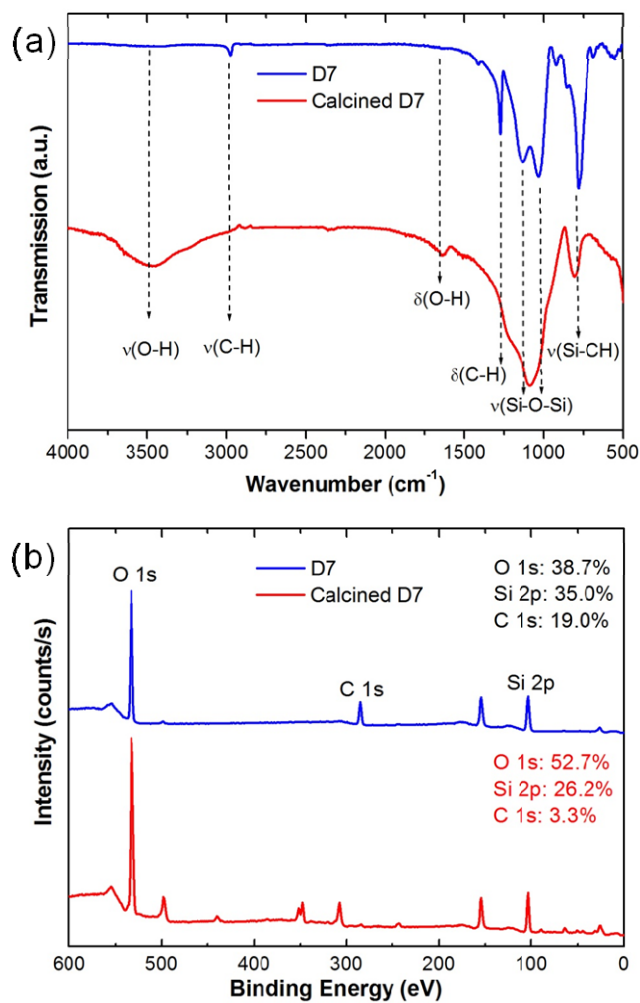

**Fig. S2** (a) FTIR and (b) XPS spectra of D7 before and after calcination at 600 °C. The peak at 348 eV in XPS spectrum of calcined D7 is Ca 2p which can be doped from glass substrate during calcination. Other unnamed peaks in the both XPS spectra are Auger peaks.

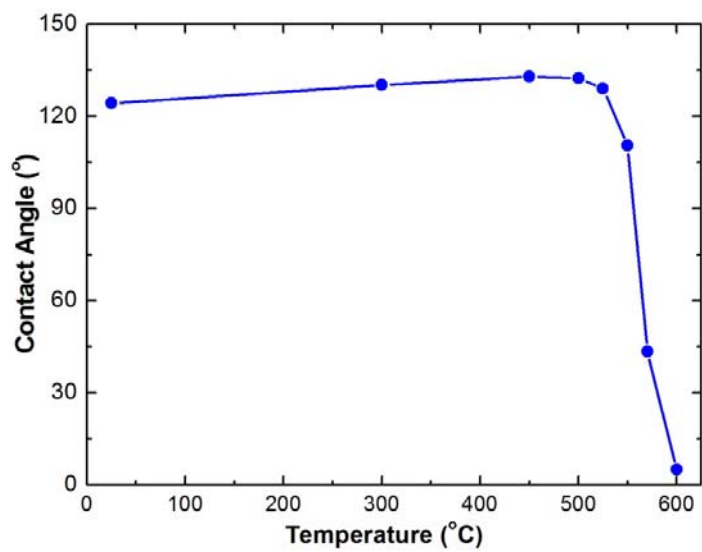

**Fig. S3** Water contact angles of the D7 film after calcination at different temperatures. Hydrophobicity is stable up to 500 °C.
